# Supplementary material
Source: ML conference proceedings conference paper supplement (https://proceedings.neurips.cc/paper_files/paper/2016/hash/495dabfd0ca768a3c3abd672079f48b6-Abstract.html)
Supplement: Supplementary file [file 495dabfd0ca768a3c3abd672079f48b6-Supplemental.zip]

## Appendix

### 5.1 Some Key Properties of NESTT-G

To facilitate the following derivation, in this section we collect some key properties of NESTT-G.

First, from the optimality condition of the  $x$  update we have

$$x_{i_r}^{r+1} = z^r - \frac{1}{\alpha_{i_r} \eta_{i_r}} \left( \lambda_{i_r}^r + \frac{1}{N} \nabla g_{i_r}(z^r) \right), \quad (5.23a)$$

$$x_j^{r+1} \stackrel{(2.6)}{=} z^r \stackrel{(2.8b)}{=} z^r - \frac{1}{\alpha_j \eta_j} (\lambda_j^r + \frac{1}{N} \nabla g_j(z^{r(j)})), \quad \forall j \neq i_r. \quad (5.23b)$$

Then using the update scheme of the  $\lambda$  we can further obtain

$$\lambda_{i_r}^{r+1} = -\frac{1}{N} \nabla g_{i_r}(z^r), \quad (5.24a)$$

$$\lambda_j^{r+1} = -\frac{1}{N} \nabla g_j(z^{r(j)}), \quad \forall j \neq i_r. \quad (5.24b)$$

Therefore, using the definition of  $y_i^r$  we have the following compact forms

$$\lambda_i^{r+1} = -\frac{1}{N} \nabla g_i(y_i^r), \quad i = 1, \dots, N. \quad (5.25)$$

$$x_i^{r+1} = z^r - \frac{1}{\alpha_i \eta_i} \left( \lambda_i^r + \frac{1}{N} \nabla g_i(y_i^r) \right), \quad i = 1, \dots, N. \quad (5.26)$$

Second, let us look at the optimality condition for the  $z$  update. The  $z$ -update (2.7) is given by

$$\begin{aligned} z^{r+1} &= \arg \min_z L(\{x_i^{r+1}\}, z; \lambda^r) \\ &= \arg \min_z \sum_{i=1}^N \left( \langle \lambda_i^r, x_i^{r+1} - z \rangle + \frac{\eta_i}{2} \|x_i^{r+1} - z\|^2 \right) + g_0(z) + h(z). \end{aligned} \quad (5.27)$$

Note that this problem is strongly convex because we have assumed that  $\sum_{i=1}^N \eta_i > 3L_0$ ; cf. Assumption [A-(c)].

Let us define

$$\begin{aligned} u^{r+1} &:= \frac{\sum_{i=1}^N \eta_i x_i^{r+1} + \sum_{i=1}^N \lambda_i^r}{\sum_{i=1}^N \eta_i} \\ &= \frac{\sum_{i=1}^N \eta_i z^r - \eta_{i_r} (z^r - x_{i_r}^{r+1})}{\sum_{i=1}^N \eta_i} + \frac{\sum_{i=1}^N \lambda_i^r}{\sum_{i=1}^N \eta_i} \\ &\stackrel{(5.23a)}{=} \frac{\sum_{i=1}^N \eta_i z^r - \frac{\eta_{i_r}}{\alpha_{i_r} \eta_{i_r}} (\lambda_{i_r}^r + \frac{1}{N} \nabla g_{i_r}(z^r))}{\sum_{i=1}^N \eta_i} + \frac{\sum_{i=1}^N \lambda_i^r}{\sum_{i=1}^N \eta_i} \\ &\stackrel{(5.25)}{=} z^r - \frac{\frac{1}{\alpha_{i_r}} (-\nabla g_{i_r}(y_{i_r}^{r-1}) + \nabla g_{i_r}(z^r))}{N \sum_{i=1}^N \eta_i} - \frac{\sum_{i=1}^N \nabla g_i(y_i^{r-1})}{N \sum_{i=1}^N \eta_i} \\ &\stackrel{(i)}{=} z^r - \frac{\beta}{N \alpha_{i_r}} (-\nabla g_{i_r}(y_{i_r}^{r-1}) + \nabla g_{i_r}(z^r)) - \frac{\beta \sum_{i=1}^N \nabla g_i(y_i^{r-1})}{N} \end{aligned} \quad (5.28)$$

$$\stackrel{(ii)}{=} z^r - \beta v_{i_r}^{r+1} \quad (5.29)$$

where in (i) we have defined  $\beta := 1 / \sum_{i=1}^N \eta_i$ ; in (ii) we have defined

$$v_{i_r}^{r+1} := \frac{1}{N} \sum_{i=1}^N \nabla g_i(y_i^{r-1}) + \frac{1}{\alpha_{i_r}} \left( -\frac{1}{N} \nabla g_{i_r}(y_{i_r}^{r-1}) + \frac{1}{N} \nabla g_{i_r}(z^r) \right). \quad (5.30)$$

Clearly if we pick  $\alpha_i = p_i$  for all  $i$ , then we have

$$\mathbb{E}_{i_r}[u^{r+1} \mid \mathcal{F}^r] = z^r - \frac{\beta}{N} \sum_{i=1}^N \nabla g_i(z^r). \quad (5.31)$$

Using the definition of  $u^{r+1}$ , it is easy to check that

$$\begin{aligned} z^{r+1} &= \arg \min_z \frac{1}{2\beta} \|z - u^{r+1}\|^2 + h(z) + g_0(z) \\ &= \text{prox}_h^{1/\beta}[u^{r+1} - \beta \nabla g_0(z^{r+1})]. \end{aligned} \quad (5.32)$$

The optimality condition for the  $z$  subproblem is given by:

$$z^{r+1} - u^{r+1} + \beta \nabla g_0(z^{r+1}) + \beta \xi^{r+1} = 0 \quad (5.33)$$

where,  $\xi^{r+1} \in \partial h(z^{r+1})$  is a subgradient of  $h(z^{r+1})$ . Using the definition of  $v_{i_r}$  in (5.30), we obtain

$$z^{r+1} = z^r - \beta(v_{i_r}^{r+1} + \nabla g_0(z^{r+1}) + \xi^{r+1}). \quad (5.34)$$

Third, if  $\alpha_i = p_i$ , then we have:

$$\begin{aligned} &\mathbb{E}_{i_r} \left[ \left\| -\frac{\lambda_{i_r}^r + 1/N \nabla g_{i_r}(z^r)}{\alpha_{i_r}} + \frac{1}{N} \sum_{i=1}^N \nabla g_i(z^r) - \sum_{i=1}^N \frac{1}{N} \nabla g_i(y_i^{r-1}) \right\|^2 \right] \\ &\stackrel{(a)}{=} \text{Var} \left[ -\frac{\lambda_{i_r}^r + 1/N \nabla g_{i_r}(z^r)}{\alpha_{i_r}} \right] \\ &\stackrel{(b)}{\leq} \sum_{i=1}^N \frac{1}{\alpha_i} \left\| \frac{1}{N} \nabla g_i(z^r) - \frac{1}{N} \nabla g_i(y_i^{r-1}) \right\|^2, \end{aligned} \quad (5.35)$$

where (a) is true because whenever  $\alpha_i = p_i$  for all  $i$ , then

$$\mathbb{E}_{i_r} \left[ -\frac{\lambda_{i_r}^r + 1/N \nabla g_{i_r}(z^r)}{\alpha_{i_r}} \right] = \frac{1}{N} \sum_{i=1}^N \nabla g_i(z^r) - \sum_{i=1}^N \frac{1}{N} \nabla g_i(y_i^{r-1});$$

The inequality in (b) is true because for a random variable  $x$  we have  $\text{Var}(x) \leq \mathbb{E}[x^2]$ .

## 5.2 Proof of Lemma 2.1

**Step 1).** Using the definition of potential function  $Q^r$ , we have:

$$\begin{aligned} &\mathbb{E}[Q^r - Q^{r-1} \mid \mathcal{F}^{r-1}] \\ &= \mathbb{E} \left[ \sum_{i=1}^N \frac{1}{N} (g_i(z^r) - g_i(z^{r-1})) + g_0(z^r) - g_0(z^{r-1}) + h(z^r) - h(z^{r-1}) \mid \mathcal{F}^{r-1} \right] \\ &+ \mathbb{E} \left[ \sum_{i=1}^N \frac{3p_i}{\alpha_i^2 \eta_i} \left\| \frac{1}{N} \nabla g_i(z^r) - \frac{1}{N} \nabla g_i(y_i^{r-1}) \right\|^2 - \frac{3p_i}{\alpha_i^2 \eta_i} \left\| \frac{1}{N} \nabla g_i(z^{r-1}) - \frac{1}{N} \nabla g_i(y_i^{r-2}) \right\|^2 \mid \mathcal{F}^{r-1} \right]. \end{aligned} \quad (5.36)$$

**Step 2).** The first term in (5.36) can be bounded as follows (omitting the subscript  $\mathcal{F}^r$ ).

$$\begin{aligned}
& \mathbb{E} \left[ \sum_{i=1}^N \frac{1}{N} (g_i(z^r) - g_i(z^{r-1})) + g_0(z^r) - g_0(z^{r-1}) + h(z^r) - h(z^{r-1}) \mid \mathcal{F}^{r-1} \right] \\
& \stackrel{(i)}{\leq} \mathbb{E} \left[ \frac{1}{N} \sum_{i=1}^N \langle \nabla g_i(z^{r-1}), z^r - z^{r-1} \rangle + \langle \nabla g_0(z^{r-1}), z^r - z^{r-1} \rangle \right. \\
& \quad \left. + \langle \xi^r, z^r - z^{r-1} \rangle + \frac{\sum_{i=1}^N L_i/N + L_0}{2} \|z^r - z^{r-1}\|^2 \mid \mathcal{F}^{r-1} \right] \\
& \stackrel{(ii)}{=} \mathbb{E} \left[ \left\langle \frac{1}{N} \sum_{i=1}^N \nabla g_i(z^{r-1}) + \xi^r + \nabla g_0(z^r) + \frac{1}{\beta} (z^r - z^{r-1}), z^r - z^{r-1} \right\rangle \mid \mathcal{F}^{r-1} \right] \\
& \quad - \left( \frac{1}{\beta} - \frac{\sum_{i=1}^N L_i/N + 3L_0}{2} \right) \mathbb{E}_{z^r} \|z^r - z^{r-1}\|^2 \\
& \stackrel{(5.34)}{=} \mathbb{E} \left[ \left\langle \frac{1}{N} \sum_{i=1}^N \nabla g_i(z^{r-1}) - v_{i(r-1)}^r, z^r - z^{r-1} \right\rangle \mid \mathcal{F}^{r-1} \right] \\
& \quad - \left( \frac{1}{\beta} - \frac{\sum_{i=1}^N L_i/N + 3L_0}{2} \right) \mathbb{E}_{z^r} \|z^r - z^{r-1}\|^2 \\
& \stackrel{(iii)}{\leq} \frac{1}{2\ell_1} \mathbb{E} \left[ \left\| \frac{1}{N} \sum_{i=1}^N \nabla g_i(z^{r-1}) - v_{i(r-1)}^r \right\|^2 \mid \mathcal{F}^{r-1} \right] + \frac{\ell_1}{2} \mathbb{E}_{z^r} \|z^r - z^{r-1}\|^2 \\
& \quad - \left( \frac{1}{\beta} - \frac{\sum_{i=1}^N L_i/N + 3L_0}{2} \right) \mathbb{E}_{z^r} \|z^r - z^{r-1}\|^2 \tag{5.37}
\end{aligned}$$

where in (i) we have used the Lipschitz continuity of the gradients of  $g_i$ 's as well as the convexity of  $h$ ; in (ii) we have used the fact that

$$\langle \nabla g_0(z^{r-1}), z^r - z^{r-1} \rangle \leq \langle \nabla g_0(z^r), z^r - z^{r-1} \rangle + L_0 \|z^r - z^{r-1}\|^2; \tag{5.38}$$

in (iii) we have applied the Young's inequality for some  $\ell_1 > 0$ .

Choosing  $\ell_1 = \frac{1}{2\beta}$ , we have:

$$\begin{aligned}
& \frac{1}{2\ell_1} \mathbb{E} \left\| \frac{1}{N} \sum_{i=1}^N \nabla g_i(z^{r-1}) - v_{i(r-1)}^r \right\|^2 \\
& \stackrel{(5.30)}{=} \beta \mathbb{E} \left[ \left\| \frac{1}{N} \sum_{i=1}^N \nabla g_i(z^{r-1}) - \frac{\lambda_{i(r-1)}^{r-1} + 1/N \nabla g_{i(r-1)}(z^{r-1})}{\alpha_{i(r-1)}} - \sum_{i=1}^N \frac{1}{N} \nabla g_i(y_i^{r-2}) \right\|^2 \right] \\
& \stackrel{(5.35)}{\leq} \beta \sum_{i=1}^N \frac{1}{\alpha_i} \left\| \frac{1}{N} \nabla g_i(z^{r-1}) - \frac{1}{N} \nabla g_i(y_i^{r-2}) \right\|^2.
\end{aligned}$$

Overall we have the following bound for the first term in (5.36):

$$\begin{aligned}
& \mathbb{E} \left[ \sum_{i=1}^N \frac{1}{N} (g_i(z^r) - g_i(z^{r-1})) + g_0(z^r) - g_0(z^{r-1}) + h(z^r) - h(z^{r-1}) \mid \mathcal{F}^{r-1} \right] \\
& \leq \sum_{i=1}^N \frac{\beta}{\alpha_i} \left\| \frac{1}{N} \nabla g_i(z^{r-1}) - \frac{1}{N} \nabla g_i(y_i^{r-2}) \right\|^2 - \left( \frac{3}{4\beta} - \frac{\sum_{i=1}^N L_i/N + 3L_0}{2} \right) \mathbb{E}_{z^r} \|z^r - z^{r-1}\|^2. \tag{5.39}
\end{aligned}$$

**Step 3).** We bound the second term in (5.36) in the following way:

$$\begin{aligned}
& \mathbb{E} [\|\nabla g_i(z^r) - \nabla g_i(y_i^{r-1})\|^2 \mid \mathcal{F}^{r-1}] \\
&= \mathbb{E} [\|\nabla g_i(z^r) - \nabla g_i(y_i^{r-1}) + \nabla g_i(z^{r-1}) - \nabla g_i(z^{r-1})\|^2 \mid \mathcal{F}^{r-1}] \\
&\stackrel{(i)}{\leq} (1 + \xi_i) \mathbb{E}_{z^r} \|\nabla g_i(z^r) - \nabla g_i(z^{r-1})\|^2 + \left(1 + \frac{1}{\xi_i}\right) \mathbb{E}_{y_i^{r-1}} \|\nabla g_i(y_i^{r-1}) - \nabla g_i(z^{r-1})\|^2 \\
&\stackrel{(ii)}{=} (1 + \xi_i) \mathbb{E}_{z^r} \|\nabla g_i(z^r) - \nabla g_i(z^{r-1})\|^2 + (1 - p_i) \left(1 + \frac{1}{\xi_i}\right) \|\nabla g_i(y_i^{r-2}) - \nabla g_i(z^{r-1})\|^2
\end{aligned} \tag{5.40}$$

where in (i) we have used the fact that the randomness of  $z^{r-1}$  comes from  $i_{r-2}$ , so fixing  $\mathcal{F}^{r-1}$ ,  $z^{r-1}$  is deterministic; we have also applied the following inequality:

$$(a + b)^2 \leq (1 + \xi)a^2 + \left(1 + \frac{1}{\xi}\right)b^2 \quad \forall \xi > 0.$$

The equality (ii) is true because the randomness of  $y_i^{r-1}$  comes from  $i_{r-1}$ , and for each  $i$  there is a probability  $p_i$  such that  $x_i^r$  is updated, so that  $\nabla g_i(y_i^{r-1}) = \nabla g_i(z^{r-1})$ , otherwise  $x_i$  is not updated so that  $\nabla g_i(y_i^{r-1}) = \nabla g_i(y_i^{r-2})$ .

**Step 4).** Applying (5.40) and set  $\alpha_i = p_i$ , the second part of (5.36) can be bounded as

$$\begin{aligned}
& \mathbb{E} \left[ \sum_{i=1}^N \frac{3p_i}{\alpha_i^2 \eta_i} \left\| \frac{1}{N} \nabla g_i(z^r) - \frac{1}{N} \nabla g_i(y_i^{r-1}) \right\|^2 - \frac{3p_i}{\alpha_i^2 \eta_i} \left\| \frac{1}{N} \nabla g_i(z^{r-1}) - \frac{1}{N} \nabla g_i(y_i^{r-2}) \right\|^2 \mid \mathcal{F}^{r-1} \right] \\
&\leq \sum_{i=1}^N \frac{3L_i^2}{\alpha_i \eta_i N^2} (1 + \xi_i) \mathbb{E}_{z^r} \|z^r - z^{r-1}\|^2 \\
&+ \frac{3}{\alpha_i \eta_i} \left( (1 - p_i) \left(1 + \frac{1}{\xi_i}\right) - 1 \right) \left\| \frac{1}{N} \nabla g_i(y_i^{r-2}) - \frac{1}{N} \nabla g_i(z^{r-1}) \right\|^2.
\end{aligned} \tag{5.41}$$

Combining (5.39) and (5.41) eventually we have

$$\begin{aligned}
& \mathbb{E}[Q^r - Q^{r-1} \mid \mathcal{F}^r] \\
&\leq \sum_{i=1}^N \left\{ \frac{\beta}{\alpha_i} + \frac{3}{\alpha_i \eta_i} \left( (1 - p_i) \left(1 + \frac{1}{\xi_i}\right) - 1 \right) \right\} \left\| \frac{1}{N} \nabla g_i(z^{r-1}) - \frac{1}{N} \nabla g_i(y_i^{r-2}) \right\|^2 \\
&+ \left\{ -\frac{3}{4\beta} + \frac{\sum_{i=1}^N L_i/N + 3L_0}{2} + \sum_{i=1}^N \frac{3L_i^2}{\alpha_i \eta_i N^2} (1 + \xi_i) \right\} \mathbb{E}_{z^r} \|z^r - z^{r-1}\|^2.
\end{aligned} \tag{5.42}$$

Let us define  $\{\tilde{c}_i\}$  and  $\hat{c}$  as following:

$$\begin{aligned}
\tilde{c}_i &= \frac{\beta}{\alpha_i} + \frac{3}{\alpha_i \eta_i} \left( (1 - p_i) \left(1 + \frac{1}{\xi_i}\right) - 1 \right) \\
\hat{c} &= -\frac{3}{4\beta} + \frac{\sum_{i=1}^N L_i/N + 3L_0}{2} + \sum_{i=1}^N \frac{3L_i^2}{\alpha_i \eta_i N^2} (1 + \xi_i).
\end{aligned}$$

In order to prove the lemma it is enough to show that  $\tilde{c}_i < -\frac{1}{2\eta_i} \forall i$ , and  $\hat{c} < -\sum_{i=1}^N \frac{\eta_i}{8}$ . Let us pick

$$\alpha_i = p_i, \quad \xi_i = \frac{2}{p_i}, \quad p_i = \frac{\eta_i}{\sum_{i=1}^N \eta_i}. \tag{5.43}$$

Recall that  $\beta = \frac{1}{\sum_{i=1}^N \eta_i}$ . These values yield the following

$$\tilde{c}_i = \frac{1}{\eta_i} - \frac{3}{\eta_i} \left( \frac{p_i + 1}{2} \right) \leq \frac{1}{\eta_i} - \frac{3}{2\eta_i} = -\frac{1}{2\eta_i} < 0.$$

To show that  $\hat{c} \leq -\sum_{i=1}^N \frac{\eta_i}{8}$  let us assume that  $\eta_i = d_i L_i$  for some  $d_i > 0$ . Note that by assumption we have

$$\sum_{i=1}^N \eta_i \geq 3L_0.$$

Therefore we have the following expression for  $\hat{c}$ :

$$\begin{aligned} \hat{c} &\leq -\sum_{i=1}^N \frac{1}{4} d_i L_i + \frac{L_i}{2N} + \frac{3L_i}{p_i d_i N^2} \left(1 + \frac{2}{p_i}\right) \\ &< \sum_{i=1}^N \frac{L_i}{d_i} \left(-\frac{1}{4} d_i^2 + \frac{d_i}{2N} + \frac{9}{p_i^2 N^2}\right). \end{aligned}$$

As a result, to have  $\hat{c} < -\sum_{i=1}^N \frac{\eta_i}{8}$ , we need

$$\frac{L_i}{d_i} \left(\frac{1}{4} d_i^2 - \frac{d_i}{2N} - \frac{9}{p_i^2 N^2}\right) \geq \frac{d_i L_i}{8}, \quad \forall i. \quad (5.44)$$

Or equivalently

$$\frac{1}{8} d_i^2 - \frac{d_i}{2N} - \frac{9}{p_i^2 N^2} \geq 0, \quad \forall i. \quad (5.45)$$

By finding the root of the above quadratic inequality, we need  $d_i \geq \frac{9}{N p_i}$ , which is equivalent to choosing the following parameters

$$\eta_i \geq \frac{9L_i}{N p_i}. \quad (5.46)$$

The lemma is proved. **Q.E.D.**

### 5.3 Proof of Theorem 2.1

First, using the fact that  $f(z)$  is lower bounded [cf. Assumption A-(a)], it is easy to verify that  $\{Q^r\}$  is a bounded sequence. Denote its lower bound to be  $\underline{Q}$ . From Lemma 2.1, it is clear that  $\{Q^r - \underline{Q}\}$  is a nonnegative supermartingale. Apply the Supermartingale Convergence Theorem [R1, Proposition 4.2] we conclude that  $\{Q^r\}$  converges almost surely (a.s.), and that

$$\|\nabla g_i(z^{r-1}) - \nabla g_i(y_i^{r-2})\|^2 \rightarrow 0, \quad \mathbb{E}_{z^r} \|z^r - z^{r-1}\| \rightarrow 0, \quad \text{a.s.}, \quad \forall i. \quad (5.47)$$

The first inequality implies that  $\|\lambda_{i_r}^r - \lambda_{i_r}^{r-1}\| \rightarrow 0$ . Combining this with equation (2.5) yields  $\|x_{i_r}^r - z^{r-1}\| \rightarrow 0$ , which further implies that  $\|z^r - z^{r-1}\| \rightarrow 0$ . By utilizing (2.8b) – (2.8c), we can conclude that

$$\|x_i^r - x_i^{r-1}\| \rightarrow 0, \quad \|\lambda_i^r - \lambda_i^{r-1}\| \rightarrow 0, \quad \text{a.s.}, \quad \forall i. \quad (5.48)$$

That is, almost surely the successive differences of all the primal and dual variables go to zero. Then it is easy to show that every limit point of the sequence  $(x^r, z^r, \lambda^r)$  converge to a stationary solution of problem (1.2) (for example, see the argument in [R2, Theorem 2.1]. Here we omit the full proof.

**Part 1).** We bound the gap in the following way (where the expectation is taking over the nature history of the algorithm):

$$\begin{aligned}
& \mathbb{E} \left[ \|z^r - \text{prox}_h^{1/\beta}[z^r - \beta \nabla(g(z^r) + g_0(z^r))]\|^2 \right] \\
& \stackrel{(a)}{=} \mathbb{E} \left[ \|z^r - z^{r+1} + \text{prox}_h^{1/\beta}[u^{r+1} - \beta \nabla g_0(z^{r+1})] - \text{prox}_h^{1/\beta}[z^r - \beta \nabla(g(z^r) + g_0(z^r))]\|^2 \right] \\
& \stackrel{(b)}{\leq} 3\mathbb{E}\|z^r - z^{r+1}\|^2 + 3\mathbb{E}\|u^{r+1} - z^r + \beta \nabla g(z^r)\|^2 + 3L_0^2 \beta^2 \|z^{r+1} - z^r\|^2 \\
& \stackrel{(c)}{\leq} \frac{10}{3} \mathbb{E}\|z^r - z^{r+1}\|^2 + 3\beta^2 \mathbb{E} \left[ \left\| \nabla g(z^r) - \frac{\lambda_{i_r}^r + 1/N \nabla g_{i_r}(z^r)}{\alpha_{i_r}} - \sum_{i=1}^N \frac{1}{N} \nabla g_i(y_i^{r-1}) \right\|^2 \right] \\
& \stackrel{(5.35)}{\leq} \frac{10}{3} \mathbb{E}\|z^r - z^{r+1}\|^2 + 3\beta^2 \sum_{i=1}^N \frac{1}{\alpha_i} \mathbb{E} \left\| \frac{1}{N} \nabla g_i(z^r) - \frac{1}{N} \nabla g_i(y_i^{r-1}) \right\|^2 \\
& \leq \frac{10}{3} \mathbb{E}\|z^r - z^{r+1}\|^2 + 3 \sum_{i=1}^N \frac{\beta}{\eta_i} \mathbb{E} \left\| \frac{1}{N} \nabla g_i(z^r) - \frac{1}{N} \nabla g_i(y_i^{r-1}) \right\|^2 \tag{5.49}
\end{aligned}$$

where (a) is due to (5.32); (b) is true due to the nonexpansiveness of the prox operator, and the Cauchy-Swartz inequality; in (c) we have used the definition of  $u$  in (5.29) and the fact that  $3L_0 \leq \sum_{i=1}^N \eta_i = \frac{1}{\beta}$  [cf. Assumption A-(c)]. In the last inequality we have applied (5.43), which implies that

$$\frac{\beta}{\alpha_i} = \frac{1}{p_i \sum_{j=1}^N \eta_j} = \frac{1}{\eta_i}. \tag{5.50}$$

Note that  $\eta_i$ 's has to satisfy (5.46). Let us follow (2.11) and choose

$$\eta_i = \frac{9L_i}{p_i N} = \frac{9 \sum_{j=1}^N \eta_j}{N \eta_i} L_i.$$

We have

$$\eta_i = \sqrt{9L_i/N \sum_{j=1}^N \eta_j} = \sqrt{9L_i/N} \sqrt{\sum_{j=1}^N \eta_j} \tag{5.51}$$

Summing  $i$  from 1 to  $N$  we have

$$\sqrt{\sum_{i=1}^N \eta_i} = \sum_{i=1}^N \sqrt{9L_i/N} \tag{5.52}$$

Then we conclude that

$$\frac{1}{\beta} = \sum_{i=1}^N \eta_i = \left( \sum_{i=1}^N \sqrt{9L_i/N} \right)^2. \tag{5.53}$$

So plugging the expression of  $\beta$  into (5.50) and (5.51), we conclude

$$\alpha_i = p_i = \frac{\sqrt{L_i/N}}{\sum_{i=1}^N \sqrt{L_i/N}}, \quad \eta_i = \sqrt{9L_i/N} \sum_{j=1}^N \sqrt{9L_j/N}. \tag{5.54}$$

After plugging in the above inequity into (2.13), we obtain:

$$\begin{aligned}
\mathbb{E}[G^r] & \stackrel{(5.49)}{\leq} \frac{10}{3\beta^2} \mathbb{E}\|z^r - z^{r+1}\|^2 + \sum_{i=1}^N \frac{3}{\beta \eta_i} \mathbb{E} \left\| \frac{1}{N} \nabla g_i(z^r) - \frac{1}{N} \nabla g_i(y_i^{r-1}) \right\|^2 \\
& \stackrel{(2.12)}{\leq} \frac{80}{3\beta} \mathbb{E}[Q^r - Q^{r+1}] = \frac{80}{3} \left( \sum_{i=1}^N \sqrt{L_i/N} \right)^2 \mathbb{E}[Q^r - Q^{r+1}]
\end{aligned} \tag{5.55}$$

If we sum both sides over  $r = 1, \dots, R$ , we obtain:

$$\sum_{r=1}^R \mathbb{E}[G^r] \leq \frac{80}{3} \left( \sum_{i=1}^N \sqrt{L_i/N} \right)^2 \mathbb{E}[Q^1 - Q^{R+1}].$$

Using the definition of  $z^m$ , we have

$$\mathbb{E}[G^m] = \mathbb{E}_{\mathcal{F}^r} [\mathbb{E}_m[G^m | \mathcal{F}^r]] = 1/R \sum_{r=1}^R \mathbb{E}_{\mathcal{F}^r}[G^r].$$

Therefore, we can finally conclude that:

$$\mathbb{E}[G^m] \leq \frac{80}{3} \left( \sum_{i=1}^N \sqrt{L_i/N} \right)^2 \frac{\mathbb{E}[Q^1 - Q^{R+1}]}{R} \quad (5.56)$$

which proves the first part.

**Part 2).** In order to prove the second part let us recycle inequality in (5.55) and write

$$\begin{aligned} & \mathbb{E} \left[ G^r + \sum_{i=1}^N \frac{3}{\beta \eta_i} \left\| \frac{1}{N} \nabla g_i(z^r) - \frac{1}{N} \nabla g_i(y_i^{r-1}) \right\|^2 \right] \\ & \leq \frac{10}{3\beta^2} \mathbb{E} \|z^{r+1} - z^r\|^2 + \sum_{i=1}^N \frac{6}{\beta \eta_i} \mathbb{E} \left\| \frac{1}{N} \nabla g_i(z^r) - \frac{1}{N} \nabla g_i(y_i^{r-1}) \right\|^2 \\ & \leq \frac{80}{3\beta} \mathbb{E}[Q^r - Q^{r+1}] = 48 \left( \sum_{i=1}^N \sqrt{L_i/N} \right)^2 \mathbb{E}[Q^r - Q^{r+1}]. \end{aligned}$$

Also note that

$$\mathbb{E}_{x^r} [\|x_i^{r+1} - z^r\|^2 | \mathcal{F}^r] = \sum_{i=1}^N \frac{1}{\alpha_i \eta_i^2} \left\| \frac{1}{N} \nabla g_i(z^r) - \frac{1}{N} \nabla g_i(y_i^{r-1}) \right\|^2 \quad (5.57)$$

Combining the above two inequalities, we conclude

$$\begin{aligned} & \mathbb{E}_{\mathcal{F}^r}[G^r] + \mathbb{E}_{\mathcal{F}^r} \left[ \sum_{i=1}^N 3\eta_i^2 \|x_i^{r+1} - z^r\|^2 \right] \\ & = \mathbb{E}_{\mathcal{F}^r}[G^r] + \mathbb{E}_{\mathcal{F}^r} \left[ \sum_{i=1}^N \frac{3\eta_i \alpha_i}{\beta} \|x_i^{r+1} - z^r\|^2 \right] \\ & = \mathbb{E} \left[ G^r + \sum_{i=1}^N \frac{3}{\beta \eta_i} \left\| \frac{1}{N} \nabla g_i(z^r) - \frac{1}{N} \nabla g_i(y_i^{r-1}) \right\|^2 \right] \\ & \leq \frac{80}{3} \left( \sum_{i=1}^N \sqrt{L_i/N} \right)^2 \mathbb{E}_{\mathcal{F}^r}[Q^r - Q^{r+1}] \end{aligned} \quad (5.58)$$

where in the first equality we have used the relation  $\frac{\alpha_i}{\beta} = \eta_i$  [cf. (5.50)]. Using a similar argument as in first part, we conclude that

$$\mathbb{E}[G^m] + \mathbb{E} \left[ \sum_{i=1}^N 3\eta_i^2 \|x_i^m - z^{m-1}\|^2 \right] \leq \frac{80}{3} \left( \sum_{i=1}^N \sqrt{L_i/N} \right)^2 \frac{\mathbb{E}[Q^1 - Q^{R+1}]}{R}. \quad (5.59)$$

This completes the proof.

**Q.E.D.**

## 5.4 Proof of Theorem 2.2

We first need the following lemma, which characterizes certain error bound condition around the stationary solution set.

**Lemma 5.1.** *Suppose Assumptions A and B hold. Let  $Z^*$  denotes the set of stationary solutions of problem (1.1), and  $\text{dist}(z, Z^*) := \min_{u \in Z^*} \|z - u\|$ . Then we have the following*

1. **(Error Bound Condition)** *For any  $\xi \geq \min_z f(z)$ , exists a positive scalar  $\tau$  such that the following error bound holds*

$$\text{dist}(z, Z^*) \leq \tau \|\tilde{\nabla}_{1/\beta} f(z)\| \quad (5.60)$$

*for all  $z \in (Z \cap \text{dom } h)$  and  $z \in \{z : f(z) \leq \xi\}$ .*

2. **(Separation of Isocost Surfaces)** *There exists a scalar  $\delta > 0$  such that*

$$\|z - v\| \geq \delta \quad \text{whenever } z \in Z^*, v \in Z^*, f(z) \neq f(v). \quad (5.61)$$

The first statement holds true largely due to [R3, Theorem 4], and the second statement holds true due to [R4, Lemma 3.1]; see detailed discussion after [R3, Assumption 2]. Here the only difference with the statement [R3, Theorem 4] is that the error bound condition (5.60) holds true *globally*. This is by the assumption that  $Z$  is a compact set. Below we provide a brief argument.

From [R3, Theorem 4], we know that when Assumption B is satisfied, we have that for any  $\xi \geq \min_z f(z)$ , there exists scalars  $\tau$  and  $\epsilon$  such that the following error bound holds

$$\text{dist}(z, Z^*) \leq \tau \|\tilde{\nabla}_{1/\beta} f(z)\|, \quad \text{whenever } \|\tilde{\nabla}_{1/\beta} f(z)\| \leq \epsilon, f(z) \leq \xi. \quad (5.62)$$

To argue that when  $Z$  is compact, the above error bound is independent of  $\epsilon$ , we use the following two steps: (1) for all  $z \in Z \cap \text{dom}(h)$  such that  $\|\tilde{\nabla}_{1/\beta} f(z)\| \leq \delta$ , it is clear that the error bound (5.60) holds true; (2) for all  $z \in Z \cap \text{dom}(h)$  such that  $\|\tilde{\nabla}_{1/\beta} f(z)\| \geq \delta$ , the ratio  $\frac{\text{dist}(z, Z^*)}{\|\tilde{\nabla}_{1/\beta} f(z)\|}$  is a continuous function and well defined over the compact set  $Z \cap \text{dom}(h) \cap \{z \mid \|\tilde{\nabla}_{1/\beta} f(z)\| \geq \delta\}$ .

Thus, the above ratio must be bounded from above by a constant  $\tau'$  (independent of  $b$ , and no greater than  $\max_{z, z' \in Z} \|z - z'\|/\delta$ ). Combining (1) and (2) yields the desired error bound over the set  $Z \cap \text{dom}(h)$ . **Q.E.D.**

### Proof of Theorem 2.2

From Theorem 2.1 we know that  $(x^r, z^r, \lambda^r)$  converges to the set of stationary solutions of problem (1.2). Let  $(x^*, z^*, \lambda^*)$  be one of such stationary solution. Then by the definition of the  $Q$  function and the fact that the successive differences of the gradients goes to zero (cf. (5.47)), we have

$$Q^* = f(z^*) = \sum_{i=1}^N 1/N g_i(z^*) + g_0(z^*) + p(z^*). \quad (5.63)$$

Then by Lemma 5.1 - (2) we know that  $f(z^r) = \sum_{i=1}^N 1/N g_i(z^r) + g_0(z^r) + p(z^r)$  will finally settle at some isocost surface of  $f$ , i.e., there exists some *finite*  $\bar{r} > 0$  such that for all  $r > \bar{r}$  and  $\bar{v} \in \mathbb{R}$  such that

$$f(\bar{z}^r) = \bar{v}, \quad \forall r \geq \bar{r} \quad (5.64)$$

where  $\bar{z}^r = \arg \min_{z \in Z^*} \|z^r - z\|$ . Therefore, combining the fact that  $\|x^{r+1} - x^r\| \rightarrow 0$ ,  $\|z^{r+1} - z^r\| \rightarrow 0$ ,  $\|x_i^{r+1} - z^{r+1}\| \rightarrow 0$  and  $\|\lambda^{r+1} - \lambda^r\| \rightarrow 0$  (cf. (5.87), (5.88)), it is easy to see that

$$L(\bar{z}^r, \bar{x}^r, \bar{\lambda}^r) = f(\bar{z}^r) = \bar{v}, \quad \forall r \geq \bar{r}, \quad (5.65)$$

where  $\bar{x}^r, \bar{\lambda}^r$  are defined similarly as  $\bar{z}^r$ .

Now we prove that the expectation of  $\Delta^{r+1} := Q^{r+1} - \bar{v}$  diminishes Q-linearly. All the expectation below is w.r.t. the natural history of the algorithm. The proof consists of the following steps:

**Step 1:** There exists  $\sigma_1 > 0$  such that

$$\mathbb{E}[Q^r - Q^{r+1}] \geq \sigma_1 \left( \mathbb{E}\|z^{r+1} - z^r\|^2 + \sum_{i=1}^N \mathbb{E}\|1/N \nabla g_i(z^r) - 1/N \nabla g_i(y_i^{r-1})\|^2 \right);$$



**Step 2:** There exists  $\tau > 0$  such that

$$\mathbb{E}\|z^r - \bar{z}^r\|^2 \leq \tau \|\mathbb{E}[\nabla_{1/\beta} \tilde{f}(z^r)]\|^2;$$

**Step 3:** There exists  $\sigma_2 > 0$  such that

$$\|\mathbb{E}[\nabla_{1/\beta} \tilde{f}(z^r)]\|^2 \leq \sigma_2 \left( \mathbb{E}\|z^{r+1} - z^r\|^2 + \sum_{i=1}^N \mathbb{E}\|1/N \nabla g_i(z^r) - 1/N \nabla g_i(y_i^{r-1})\|^2 \right);$$

**Step 4:** There exists  $\sigma_3 > 0$  such that the following relation holds true for all  $r \geq \bar{r}$

$$\mathbb{E}[Q^{r+1} - \bar{v}] \leq \sigma_3 \left( \mathbb{E}\|z^r - \bar{z}^r\|^2 + \mathbb{E}\|z^{r+1} - z^r\|^2 + \sum_{i=1}^N \mathbb{E}\|1/N \nabla g_i(z^r) - 1/N \nabla g_i(y_i^{r-1})\|^2 \right).$$

These steps will be verified one by one shortly. But let us suppose that they all hold true. Below we show that linear convergence can be obtained.

Combining step 4 and step 2 we conclude that there exists  $\sigma_3 > 0$  such that for all  $r \geq \bar{r}$

$$\mathbb{E}[Q^{r+1} - \bar{v}] \leq \sigma_3 \left( \tau \|\mathbb{E}[\nabla_{1/\beta} \tilde{f}(z^{r-1})]\|^2 + \mathbb{E}\|z^{r+1} - z^r\|^2 + \sum_{i=1}^N \mathbb{E}\|1/N \nabla g_i(z^r) - 1/N \nabla g_i(y_i^{r-1})\|^2 \right).$$

Then if we bound  $\|\mathbb{E}(G^r)\|^2$  using step 3, we can simply make a  $\sigma_4 > 0$  such that

$$\mathbb{E}[Q^{r+1} - \bar{v}] \leq \sigma_4 \left( \mathbb{E}\|z^{r+1} - z^r\|^2 + \sum_{i=1}^N \mathbb{E}\|1/N \nabla g_i(z^r) - 1/N \nabla g_i(y_i^{r-1})\|^2 \right).$$

Finally, applying step 1 we reach the following bound for  $\mathbb{E}[Q^{r+1} - \bar{v}]$ :

$$\mathbb{E}[Q^{r+1} - \bar{v}] \leq \frac{\sigma_4}{\sigma_1} \mathbb{E}[Q^r - Q^{r+1}], \quad \forall r \geq \bar{r},$$

which further implies that for  $\sigma_5 = \frac{\sigma_4}{\sigma_1} > 0$ , we have

$$\mathbb{E}[\Delta^{r+1}] \leq \frac{\sigma_5}{1 + \sigma_5} \mathbb{E}[\Delta^r], \quad \forall r \geq \bar{r}.$$

Now let us verify the correctness of each step. Step 1 can be directly obtained from equation (2.12). Step 2 is exactly Lemma (5.1). Step 3 can be verified using a similar derivation as in (5.49)<sup>5</sup>.

Below let us prove the step 4, which is a bit involved. From (2.7) we know that

$$z^{r+1} = \arg \min_z h(z) + g_0(z) + \sum_{i=1}^N \langle \lambda_i^r, x_i^{r+1} - z \rangle + \frac{\eta_i}{2} \|x_i^{r+1} - z\|^2.$$

This implies that

$$\begin{aligned} h(z^{r+1}) + g_0(z^{r+1}) &+ \sum_{i=1}^N \langle \lambda_i^r, x_i^{r+1} - z^{r+1} \rangle + \frac{\eta_i}{2} \|x_i^{r+1} - z^{r+1}\|^2 \\ &\leq h(\bar{z}^r) + g_0(\bar{z}^r) + \sum_{i=1}^N \langle \lambda_i^r, x_i^{r+1} - \bar{z}^r \rangle + \frac{\eta_i}{2} \|x_i^{r+1} - \bar{z}^r\|^2. \end{aligned} \quad (5.66)$$

Rearranging the terms, we obtain

$$h(z^{r+1}) + g_0(z^{r+1}) - h(\bar{z}^r) - g_0(\bar{z}^r) \leq \sum_{i=1}^N \langle \lambda_i^r, z^{r+1} - \bar{z}^r \rangle + \frac{\eta_i}{2} \|x_i^{r+1} - \bar{z}^r\|^2.$$

---

<sup>5</sup>We simply need to replace  $-z^{r-1} + \text{prox}_h^{1/\beta}[u^{r-1} - \beta \nabla g_0(z^{r-1})]$  in step (a) of (5.49) by  $-z^r + \text{prox}_h^{1/\beta}[u^r - \beta \nabla g_0(z^r)]$  and using the same derivation.

Using this inequality we have:

$$\begin{aligned}
Q^{r+1} - \bar{v} &\leq \sum_{i=1}^N 1/N (g_i(z^{r+1}) - g_i(\bar{z}^r)) + \langle \lambda_i^r, z^{r+1} - \bar{z}^r \rangle \\
&\quad + \sum_{i=1}^N \frac{\eta_i}{2} \|x_i^{r+1} - \bar{z}^r\|^2 + \|1/N(\nabla g_i(z^r) - \nabla g_i(y_i^{r-1}))\|^2.
\end{aligned} \tag{5.67}$$

The first term in RHS can be bounded as follows:

$$\begin{aligned}
&\sum_{i=1}^N 1/N (g_i(z^{r+1}) - g_i(\bar{z}^r)) \\
&\stackrel{(a)}{\leq} \sum_{i=1}^N 1/N \langle \nabla g_i(\bar{z}^r), z^{r+1} - \bar{z}^r \rangle + L_i/2N \|z^{r+1} - \bar{z}^r\|^2 \\
&\leq \sum_{i=1}^N 1/N \langle \nabla g_i(\bar{z}^r) + \nabla g_i(z^{r+1}) - \nabla g_i(z^{r+1}), z^{r+1} - \bar{z}^r \rangle + L_i/2N \|z^{r+1} - \bar{z}^r\|^2 \\
&\stackrel{(b)}{\leq} \sum_{i=1}^N 1/N \langle \nabla g_i(z^{r+1}), z^{r+1} - \bar{z}^r \rangle + 3L_i/2N \|z^{r+1} - \bar{z}^r\|^2,
\end{aligned}$$

where (a) is true due to the descent lemma; and (b) comes from the Lipschitz continuity of the  $\nabla g_i$ .

Plugging the above bound into (5.67), we further have:

$$\begin{aligned}
Q^{r+1} - \bar{v} &\leq \sum_{i=1}^N 1/N \langle \nabla g_i(z^{r+1}) - \nabla g_i(y_i^{r-1}), z^{r+1} - \bar{z}^r \rangle + 3L_i/2N \|z^{r+1} - \bar{z}^r\|^2 \\
&\quad + \frac{\eta_i}{2} \|x_i^{r+1} - \bar{z}^r\|^2 + \|1/N(\nabla g_i(z^r) - \nabla g_i(y_i^{r-1}))\|^2 \\
&= \sum_{i=1}^N 1/N \langle \nabla g_i(z^{r+1}) + \nabla g_i(z^r) - \nabla g_i(z^r) - \nabla g_i(y_i^{r-1}), z^{r+1} - \bar{z}^r \rangle \\
&\quad + \frac{\eta_i}{2} \|x_i^{r+1} - \bar{z}^r\|^2 + \|1/N(\nabla g_i(z^r) - \nabla g_i(y_i^{r-1}))\|^2 + 3L_i/2N \|z^{r+1} - \bar{z}^r\|^2,
\end{aligned}$$

where in the first inequality we have used the fact that  $\lambda_i^r = -\frac{1}{N} \nabla g_i(y_i^{r-1})$ ; cf . (5.25). Applying the Cauchy-Schwartz inequality we further have:

$$\begin{aligned}
Q^{r+1} - \bar{v} &\leq \sum_{i=1}^N 1/2 \|1/N (\nabla g_i(z^{r+1}) + \nabla g_i(z^r))\|^2 + 1/2 \|z^{r+1} - \bar{z}^r\|^2 \\
&\quad + \sum_{i=1}^N 1/2 \|1/N (\nabla g_i(z^r) - \nabla g_i(y_i^{r-1}))\|^2 + 1/2 \|z^{r+1} - \bar{z}^r\|^2 \\
&\quad + \frac{\eta_i}{2} \|x_i^{r+1} - \bar{z}^r\|^2 + \|1/N(\nabla g_i(z^r) - \nabla g_i(y_i^{r-1}))\|^2 + 3L_i/2N \|z^{r+1} - \bar{z}^r\|^2 \\
&\leq \sum_{i=1}^N \left[ \frac{L_i^2}{2N^2} \|z^{r+1} - \bar{z}^r\|^2 + \frac{3}{2N^2} \|\nabla g_i(z^r) - \nabla g_i(y_i^{r-1})\|^2 + \frac{\eta_i}{2} \|x_i^{r+1} - \bar{z}^r\|^2 \right] \\
&\quad + (1 + 3L_i/2N) \|z^{r+1} - \bar{z}^r\|^2.
\end{aligned} \tag{5.68}$$

Now let us bound  $\sum_{i=1}^N \frac{\eta_i}{2} \|x_i^{r+1} - \bar{z}^r\|^2$  in the above inequality:

$$\begin{aligned}
\sum_{i=1}^N \frac{\eta_i}{2} \|x_i^{r+1} - \bar{z}^r\|^2 &= \sum_{i=1}^N \frac{\eta_i}{2} \|x_i^{r+1} - z^{r+1} + z^{r+1} - \bar{z}^r\|^2 \\
&\leq \sum_{i=1}^N \eta_i \|x_i^{r+1} - z^{r+1}\|^2 + \eta_i \|z^{r+1} - \bar{z}^r\|^2 \\
&= \sum_{i=1}^N \eta_i \|x_i^{r+1} - z^r + z^r - z^{r+1}\|^2 + \eta_i \|z^{r+1} - \bar{z}^r\|^2 \\
&\leq \sum_{i=1}^N 2\eta_i \|x_i^{r+1} - z^r\|^2 + 2\eta_i \|z^r - z^{r+1}\|^2 + \eta_i \|z^{r+1} - \bar{z}^r\|^2.
\end{aligned}$$

Using the fact that  $x_i^{r+1} = z^r$  when  $i \neq i_r$  we further have:

$$\begin{aligned}
\sum_{i=1}^N \frac{\eta_i}{2} \|x_i^{r+1} - \bar{z}^r\|^2 &\leq 2\eta_{i_r} \|x_{i_r}^{r+1} - z^r\|^2 + \sum_{i=1}^N 2\eta_i \|z^r - z^{r+1}\|^2 + \eta_i \|z^{r+1} - \bar{z}^r\|^2 \\
&= \frac{2}{\alpha_{i_r}^2 \eta_{i_r}} \|\lambda_{i_r} + 1/N \nabla g_{i_r}(z^r)\|^2 + \sum_{i=1}^N 2\eta_i \|z^r - z^{r+1}\|^2 + \eta_i \|z^{r+1} - \bar{z}^r\|^2 \\
&= \frac{2}{\alpha_{i_r}^2 \eta_{i_r} N^2} \|\nabla g_{i_r}(z^r) - \nabla g_{i_r}(y_{i_r}^{r-1})\|^2 \\
&\quad + \sum_{i=1}^N 2\eta_i \|z^r - z^{r+1}\|^2 + \eta_i \|z^{r+1} - z^r + z^r - \bar{z}^r\|^2 \\
&\leq \frac{2}{\alpha_{i_r}^2 \eta_{i_r} N^2} \|\nabla g_{i_r}(z^r) - \nabla g_{i_r}(y_{i_r}^{r-1})\|^2 \\
&\quad + \sum_{i=1}^N 4\eta_i \|z^r - z^{r+1}\|^2 + 2\eta_i \|z^r - \bar{z}^r\|^2. \tag{5.69}
\end{aligned}$$

Take expectation on both sides of the above equation and set  $p_i = \alpha_i$ , we obtain:

$$\begin{aligned}
\sum_{i=1}^N \frac{\eta_i}{2} \mathbb{E} \|x_i^{r+1} - \bar{z}^r\|^2 &\leq \sum_{i=1}^N \frac{2}{\alpha_i \eta_i} \mathbb{E} \|\nabla g_i(z^r) - \nabla g_i(y_i^{r-1})\|^2 \\
&\quad + \sum_{i=1}^N 4\eta_i \mathbb{E} \|z^r - z^{r+1}\|^2 + 2\eta_i \mathbb{E} \|z^r - \bar{z}^r\|^2.
\end{aligned}$$

Combining equations (5.68) and (5.69), eventually one can find  $\sigma_3 > 0$  such that

$$\mathbb{E}[Q^{r+1} - \bar{v}] \leq \sigma_3 \left( \mathbb{E} \|z^r - \bar{z}\|^2 + \mathbb{E} \|z^{r+1} - z^r\|^2 + \sum_{i=1}^N \mathbb{E} \|1/N \nabla g_i(z^r) - 1/N \nabla g_i(y_i^{r-1})\|^2 \right),$$

which completes the proof of Step 4.

In summary, we have shown that Step 1 - 4 all hold true. Therefore we have shown that the NESTT-G converges Q-linearly. **Q.E.D.**

## 5.5 Some Key Properties of NESTT-E

To facilitate the following derivation, in this section we collect some key properties of NESTT-E.

First, for  $i = i_r$ , using the optimality condition for  $x_i$  update step (3.16) we have the following identity:

$$\frac{1}{N} \nabla g_{i_r}(x_{i_r}^{r+1}) + \lambda_{i_r}^r + \alpha_{i_r} \eta_{i_r} (x_{i_r}^{r+1} - z^{r+1}) = 0. \tag{5.70}$$

Combined with the dual variable update step (3.17) we obtain

$$\frac{1}{N} \nabla g_{i_r}(x_{i_r}^{r+1}) = -\lambda_{i_r}^{r+1}. \quad (5.71)$$

Second, the optimality condition for the  $z$ -update is given by:

$$z^{r+1} = \text{prox}_h \left[ z^{r+1} - \nabla_z (L(x^r, z, \lambda^r) - h(z)) \right] \quad (5.72)$$

$$= \text{prox}_h \left[ z^{r+1} - \sum_{i=1}^N \eta_i \left( z^{r+1} - x_i^r - \frac{\lambda_i^r}{\eta_i} \right) - \nabla g_0(z^{r+1}) \right]. \quad (5.73)$$

## 5.6 Proof of Theorem 3.1

To prove this result, we need a few lemmas.

For notational simplicity, define new variables  $\{\hat{x}_i^{r+1}\}, \{\hat{\lambda}_i^{r+1}\}$  by

$$\hat{x}_i^{r+1} := \arg \min_{x_i} U_i(x_i, z^{r+1}, \lambda_i^r), \quad \hat{\lambda}_i^{r+1} := \lambda_i^r + \alpha_i \eta_i (\hat{x}_i^{r+1} - z^{r+1}), \quad \forall i. \quad (5.74)$$

These variables are the *virtual variables* generated by updating all variables at iteration  $r + 1$ . Also define:

$$L^r := L(x^r, z^r; \lambda^r), \quad w := (x, z, \lambda), \quad \beta := \frac{1}{\sum_{i=1}^N \eta_i}, \quad c_i := \frac{L_i^2}{\alpha_i \eta_i N^2} - \frac{\gamma_i}{2} + \frac{1 - \alpha_i}{\alpha_i} \frac{L_i}{N}$$

First, we need the following lemma to show that the size of the successive difference of the dual variables can be upper bounded by that of the primal variables. This is a simple consequence of (5.71); also see [R2, Lemma 2.1]. We include the proof for completeness.

**Lemma 5.2.** *Suppose assumption A holds. Then for NESTT-E algorithm, the following are true:*

$$\|\lambda_i^{r+1} - \lambda_i^r\|^2 \leq \frac{L_i^2}{N^2} \|x_i^{r+1} - x_i^r\|^2, \quad \|\hat{\lambda}_i^{r+1} - \lambda_i^r\|^2 \leq \frac{L_i^2}{N^2} \|\hat{x}_i^{r+1} - x_i^r\|^2, \quad \forall i. \quad (5.75a)$$

**Proof.** We only show the first inequality. The second one follows an analogous argument.

To prove (5.75a), first note that the case for  $i \neq i_r$  is trivial, as both sides of (5.75a) are zero. For the index  $i_r$ , we have a closed-form expression for  $\lambda_{i_r}^r$  following (5.71). Notice that for any given  $i$ , the primal-dual pair  $(x_i, \lambda_i)$  is always updated at the same iteration. Therefore, if for each  $i$  we choose the initial solutions in a way such that  $\lambda_i^0 = -\nabla g_i(x_i^0)$ , then we have

$$\frac{1}{N} \nabla g_i(x_i^{r+1}) = -\lambda_i^{r+1} \quad \forall i = 1, 2, \dots, N. \quad (5.76)$$

Combining (5.76) with Assumption A-(a) yields the following:

$$\|\lambda_i^{r+1} - \lambda_i^r\| = \frac{1}{N} \|\nabla g_i(x_i^{r+1}) - \nabla g_i(x_i^r)\| \leq \frac{L_i}{N} \|x_i^{r+1} - x_i^r\|.$$

The proof is complete. **Q.E.D.**

Second, we bound the successive difference of the potential function.

**Lemma 5.3.** *Suppose Assumption A holds true. Then the following holds for NESTT-E*

$$\mathbb{E}[L^{r+1} - L^r | x^r, z^r] \leq -\frac{\gamma_z}{2} \|z^{r+1} - z^r\|^2 + \sum_{i=1}^N p_i c_i \|x_i^r - \hat{x}_i^{r+1}\|^2. \quad (5.77)$$

**Proof.** First let us split  $L^{r+1} - L^r$  in the following way:

$$L^{r+1} - L^r = L^{r+1} - L(x^{r+1}, z^{r+1}; \lambda^r) + L(x^{r+1}, z^{r+1}; \lambda^r) - L^r. \quad (5.78)$$

The first two terms in (5.78) can be bounded by

$$\begin{aligned} L^{r+1} - L(x^{r+1}, z^{r+1}; \lambda^r) &= \sum_{i=1}^N \langle \lambda_i^{r+1} - \lambda_i^r, x_i^{r+1} - z^{r+1} \rangle \\ &\stackrel{(a)}{=} \frac{1}{\alpha_{i_r} \eta_{i_r}} \|\lambda_{i_r}^{r+1} - \lambda_{i_r}^r\|^2 \stackrel{(b)}{\leq} \frac{L_{i_r}^2}{N^2 \alpha_{i_r} \eta_{i_r}} \|x_{i_r}^{r+1} - x_{i_r}^r\|^2 \end{aligned} \quad (5.79)$$

where in (a) we have used (3.17), and the fact that  $\lambda_i^{r+1} - \lambda_i^r = 0$  for all variable blocks except  $i_r$ th block; (b) is true because of Lemma 5.2.

The last two terms in (5.78) can be written in the following way:

$$\begin{aligned} L(\{x_i^{r+1}\}, z^{r+1}; \lambda^r) - L^r \\ = L(x^{r+1}, z^{r+1}; \lambda^r) - L(x^r, z^{r+1}; \lambda^r) + L(x^r, z^{r+1}; \lambda^r) - L^r. \end{aligned} \quad (5.80)$$

The first two terms in (5.80) characterizes the change of the Augmented Lagrangian before and after the update of  $x$ . Note that  $x$  updates do not directly optimize the augmented Lagrangian. Therefore the characterization of this step is a bit involved. We have the following:

$$\begin{aligned} &L(x^{r+1}, z^{r+1}; \lambda^r) - L(x^r, z^{r+1}; \lambda^r) \\ &\stackrel{(a)}{\leq} \sum_{i=1}^N \left( \langle \nabla_i L(x^{r+1}, z^{r+1}; \lambda^r), x_i^{r+1} - x_i^r \rangle - \frac{\gamma_i}{2} \|x_i^{r+1} - x_i^r\|^2 \right) \\ &\stackrel{(b)}{=} \langle \nabla_{i_r} L(x^{r+1}, z^{r+1}; \lambda^r), x_{i_r}^{r+1} - x_{i_r}^r \rangle - \frac{\gamma_{i_r}}{2} \|x_{i_r}^{r+1} - x_{i_r}^r\|^2 \\ &\stackrel{(c)}{=} \langle \nabla_{i_r} (1 - \alpha_{i_r})(x_{i_r}^{r+1} - z^{r+1}), x_{i_r}^{r+1} - x_{i_r}^r \rangle - \frac{\gamma_{i_r}}{2} \|x_{i_r}^{r+1} - x_{i_r}^r\|^2 \\ &\stackrel{(d)}{=} \left\langle \frac{1 - \alpha_{i_r}}{\alpha_{i_r}} (\lambda_{i_r}^{r+1} - \lambda_{i_r}^r), x_{i_r}^{r+1} - x_{i_r}^r \right\rangle - \frac{\gamma_{i_r}}{2} \|x_{i_r}^{r+1} - x_{i_r}^r\|^2 \\ &\leq \frac{1 - \alpha_{i_r}}{\alpha_{i_r}} \left( \frac{1}{2L_{i_r}/N} \|\lambda_{i_r}^{r+1} - \lambda_{i_r}^r\|^2 + \frac{L_{i_r}}{2N} \|x_{i_r}^{r+1} - x_{i_r}^r\|^2 \right) - \frac{\gamma_{i_r}}{2} \|x_{i_r}^{r+1} - x_{i_r}^r\|^2 \\ &\stackrel{(e)}{\leq} \frac{1 - \alpha_{i_r}}{\alpha_{i_r}} \frac{L_{i_r}}{N} \|x_{i_r}^{r+1} - x_{i_r}^r\|^2 - \frac{\gamma_{i_r}}{2} \|x_{i_r}^{r+1} - x_{i_r}^r\|^2 \end{aligned} \quad (5.81)$$

where

- (a) is true because  $L(x, z, \lambda)$  is strongly convex with respect to  $x_i$ .
- (b) is true because when  $i \neq i_r$ , we have  $x_i^{r+1} = x_i^r$ .
- (c) is true because  $x_{i_r}^{r+1}$  is optimal solution for the problem  $\min U_{i_r}(x_{i_r}, z^{r+1}, \lambda_{i_r}^r)$  (satisfying (5.70)), and we have used the optimality of such  $x_{i_r}^{r+1}$ .
- (d) and (e) are due to Lemma 5.2.

Similarly, the last two terms in (5.80) can be bounded using equation (5.70) and the strong convexity of function  $L$  with respect to the variable  $z$ . Therefor We have:

$$L(x^r, z^{r+1}, \lambda^r) - L^r \leq -\frac{\gamma_z}{2} \|z^{r+1} - z^r\|^2. \quad (5.82)$$

Combining equations (5.79), (5.81) and (5.82), eventually we have:

$$L^{r+1} - L(x^r, z^{r+1}, \lambda^r) \leq c_{i_r} \|x_{i_r}^r - x_{i_r}^{r+1}\|^2 \quad (5.83)$$

$$L^{r+1} - L^r \leq -\frac{\gamma_z}{2} \|z^{r+1} - z^r\|^2 + c_{i_r} \|x_{i_r}^r - x_{i_r}^{r+1}\|^2 \quad (5.84)$$

Taking expectation on both side of this inequality with respect to  $i_r$ , we can conclude that:

$$\mathbb{E}[L^{r+1} - L^r \mid z^r, x^r] \leq -\frac{\gamma_z}{2} \|z^{r+1} - z^r\|^2 + \sum_{i=1}^N p_i c_i \|x_i^r - \hat{x}_i^{r+1}\|^2 \quad (5.85)$$

where  $p_i$  is the probability of picking  $i$ th block. The lemma is proved.

**Q.E.D.**

**Lemma 5.4.** Suppose that Assumption A is satisfied, then  $L^r \geq \underline{f}$ .

**Proof.** Using the definition of the augmented Lagrangian function we have:

$$\begin{aligned}
L^{r+1} &= \sum_{i=1}^N \left( \frac{1}{N} g_i(x_i^{r+1}) + \langle \lambda_i^{r+1}, x_i^{r+1} - z^{r+1} \rangle + \frac{\eta_i}{2} \|x_i^{r+1} - z^{r+1}\|^2 \right) + g_0(z^{r+1}) + p(z^{r+1}) \\
&\stackrel{(a)}{=} \sum_{i=1}^N \left( \frac{1}{N} g_i(x_i^{r+1}) + \frac{1}{N} \langle \nabla g_i(x_i^{r+1}), z^{r+1} - x_i^{r+1} \rangle + \frac{\eta_i}{2} \|x_i^{r+1} - z^{r+1}\|^2 \right) + g_0(z^{r+1}) + p(z^{r+1}) \\
&\stackrel{(b)}{\geq} \sum_{i=1}^N \frac{1}{N} g_i(z^{r+1}) + \left( \frac{\eta_i}{2} - \frac{L_i}{2N} \right) \|z^{r+1} - x_i^{r+1}\|^2 + g_0(z^{r+1}) + p(z^{r+1}) \\
&\stackrel{(c)}{\geq} \sum_{i=1}^N \frac{1}{N} g_i(z^{r+1}) + g_0(z^{r+1}) + p(z^{r+1}) \geq \underline{f}
\end{aligned} \tag{5.86}$$

where (a) is true because of equation (5.71); (b) follows Assumption A-(b); (c) follows Assumption A-(d). The desired result is proven. **Q.E.D.**

**Proof of Theorem 3.1.** We first show that the algorithm converges to the set of stationary solutions, and then establish the convergence rate.

**Step 1. Convergence to Stationary Solutions.** Combining the descent estimate in Lemma 5.3 as well as the lower bounded condition in Lemma 5.4, we can again apply the Supermartingale Convergence Theorem [R1, Proposition 4.2] and conclude that

$$\|x_i^{r+1} - x_i^r\| \rightarrow 0, \quad \|z^{r+1} - z^r\| \rightarrow 0, \text{ with probability 1.} \tag{5.87}$$

From Lemma 5.2 we have that the constraint violation is satisfied

$$\|\lambda^{r+1} - \lambda^r\| \rightarrow 0, \quad \|x_i^{r+1} - z^r\| \rightarrow 0. \tag{5.88}$$

The rest of the proof follows similar lines as in [R2, Theorem 2.4]. Due to space limitations we omit the proof.

**Step 2. Convergence Rate.** We first show that there exists a  $\sigma_1(\alpha) > 0$  such that

$$\|\tilde{\nabla} L(w^r)\|^2 + \sum_{i=1}^N \frac{L_i^2}{N^2} \|x_i^r - z^r\|^2 \leq \sigma_1(\alpha) \left( \|z^r - z^{r+1}\|^2 + \sum_{i=1}^N \|x_i^r - \hat{x}_i^{r+1}\|^2 \right). \tag{5.89}$$

Using the definition of  $\|\tilde{\nabla} L^r(w^r)\|$  we have:

$$\begin{aligned}
\|\tilde{\nabla} L^r(w^r)\|^2 &= \|z^r - \text{prox}_h[z^r - \nabla_z(L^r - h(z^r))]\|^2 \\
&\quad + \sum_{i=1}^N \left\| \frac{1}{N} \nabla g_i(x_i^r) + \lambda_i^r + \eta_i(x_i^r - z^r) \right\|^2.
\end{aligned} \tag{5.90}$$

From the optimality condition of the  $z$  update (5.73) we have:

$$z^{r+1} = \text{prox}_h \left[ z^{r+1} - \sum_{i=1}^N \eta_i \left( z^{r+1} - x_i^r - \frac{\lambda_i^r}{\eta_i} \right) - \nabla g_0(z^{r+1}) \right].$$

Using this, the first term in equation (5.90) can be bounded as:

$$\begin{aligned}
& \|z^r - \text{prox}_h[z^r - \nabla_z(L^r - h(z^r))]\| \\
&= \left\| z^r - z^{r+1} + z^{r+1} - \text{prox}_h \left[ z^r - \sum_{i=1}^N \eta_i \left( z^r - x_i^r - \frac{\lambda_i^r}{\eta_i} \right) - \nabla g_0(z^r) \right] \right\| \\
&\leq \|z^r - z^{r+1}\| + \left\| \text{prox}_h \left[ z^{r+1} - \sum_{i=1}^N \eta_i \left( z^{r+1} - x_i^r - \frac{\lambda_i^r}{\eta_i} \right) - \nabla g_0(z^{r+1}) \right] \right. \\
&\quad \left. - \text{prox}_h \left[ z^r - \sum_{i=1}^N \eta_i \left( z^r - x_i^r - \frac{\lambda_i^r}{\eta_i} \right) - \nabla g_0(z^r) \right] \right\| \\
&\leq 2\|z^{r+1} - z^r\| + \left( \sum_{i=1}^N \eta_i + L_0 \right) \|z^r - z^{r+1}\|, \tag{5.91}
\end{aligned}$$

where in the last inequality we have used the nonexpansiveness of the proximity operator.

Similarly, the optimality condition of the  $x_i$  subproblem is given by

$$\frac{1}{N} \nabla g_i(\hat{x}_i^{r+1}) + \lambda_i^r + \alpha_i \eta_i (\hat{x}_i^{r+1} - z^{r+1}) = 0. \tag{5.92}$$

Applying this identity, the second term in equation (5.90) can be written as follows:

$$\begin{aligned}
& \sum_{i=1}^N \left\| \frac{1}{N} \nabla g_i(x_i^r) + \lambda_i^r + \eta_i (x_i^r - z^r) \right\|^2 \\
&\stackrel{(a)}{=} \sum_{i=1}^N \left\| \frac{1}{N} \nabla g_i(x_i^r) - \frac{1}{N} \nabla g_i(\hat{x}_i^{r+1}) + \eta_i (x_i^r - z^r) - \alpha_i \eta_i (\hat{x}_i^{r+1} - z^{r+1}) \right\|^2 \\
&= \sum_{i=1}^N \left\| \frac{1}{N} \nabla g_i(x_i^r) - \frac{1}{N} \nabla g_i(\hat{x}_i^{r+1}) + \eta_i (x_i^r - \hat{x}_i^{r+1} + \hat{x}_i^{r+1} - z^{r+1} + z^{r+1} - z^r) - \alpha_i \eta_i (\hat{x}_i^{r+1} - z^{r+1}) \right\|^2 \\
&\stackrel{(b)}{\leq} 4 \sum_{i=1}^N \left[ \left( \frac{L_i^2}{N^2} + \eta_i^2 + \frac{(1 - \alpha_i)^2 L_i^2}{N^2 \alpha_i^2} \right) \|\hat{x}_i^{r+1} - x_i^r\|^2 + \eta_i^2 \|z^{r+1} - z^r\|^2 \right], \tag{5.93}
\end{aligned}$$

where (a) holds because of equation (5.92); (b) holds because of Lemma 5.2.

Finally, combining (5.91) and (5.93) leads to the following bound for proximal gradient

$$\begin{aligned}
\|\tilde{\nabla} L^r\|^2 &\leq \left( 4 \sum_{i=1}^N \eta_i^2 + \left( 2 + L_0 + \sum_{i=1}^N \eta_i \right)^2 \right) \|z^r - z^{r+1}\|^2 \\
&\quad + \sum_{i=1}^N 4 \left( \frac{L_i^2}{N^2} + \eta_i^2 + \frac{(1 - \alpha_i)^2 L_i^2}{N^2 \alpha_i^2} \right) \|x_i^r - \hat{x}_i^{r+1}\|^2. \tag{5.94}
\end{aligned}$$

Also note that:

$$\begin{aligned}
\sum_{i=1}^N \frac{L_i^2}{N^2} \|x_i^r - z^r\|^2 &\leq \sum_{i=1}^N 3 \frac{L_i^2}{N^2} [\|x_i^r - \hat{x}_i^{r+1}\|^2 + \|\hat{x}_i^{r+1} - z^{r+1}\|^2 + \|z^{r+1} - z^r\|^2] \\
&= \sum_{i=1}^N 3 \frac{L_i^2}{N^2} \left[ \|x_i^r - \hat{x}_i^{r+1}\|^2 + \frac{1}{\alpha_i^2 \eta_i^2} \|\hat{\lambda}_i^{r+1} - \lambda_i^r\|^2 + \|z^{r+1} - z^r\|^2 \right] \\
&\leq \sum_{i=1}^N 3 \frac{L_i^2}{N^2} \left[ \|x_i^r - \hat{x}_i^{r+1}\|^2 + \frac{L_i^2}{\alpha_i^2 \eta_i^2 N^2} \|\hat{x}_i^{r+1} - x_i^r\|^2 + \|z^{r+1} - z^r\|^2 \right]. \tag{5.95}
\end{aligned}$$

The two inequalities (5.94) – (5.95) imply that:

$$\begin{aligned}
& \|\tilde{\nabla} L^r\|^2 + \sum_{i=1}^N \frac{L_i^2}{N^2} \|x_i^r - z^r\|^2 \\
& \leq \left( \sum_{i=1}^N 4\eta_i^2 + (2 + \sum_{i=1}^N \eta_i + L_0)^2 + 3 \sum_{i=1}^N \frac{L_i^2}{N^2} \right) \|z^r - z^{r+1}\|^2 \\
& + \sum_{i=1}^N \left( 4 \left( \frac{L_i^2}{N^2} + \eta_i^2 + \left( \frac{1}{\alpha_i} - 1 \right)^2 \frac{L_i^2}{N^2} \right) + 3 \left( \frac{L_i^4}{\alpha_i N^4 \eta_i^2} + \frac{L_i^2}{N^2} \right) \right) \|x_i^r - \hat{x}_i^{r+1}\|^2. \tag{5.96}
\end{aligned}$$

Define the following quantities:

$$\begin{aligned}
\hat{\sigma}_1(\alpha) &= \max_i \left\{ 4 \left( \frac{L_i^2}{N^2} + \eta_i^2 + \left( \frac{1}{\alpha_i} - 1 \right)^2 \frac{L_i^2}{N^2} \right) + 3 \left( \frac{L_i^4}{\alpha_i \eta_i^2 N^4} + \frac{L_i^2}{N^2} \right) \right\} \\
\tilde{\sigma}_1 &= \sum_{i=1}^N 4\eta_i^2 + (2 + \sum_{i=1}^N \eta_i + L_0)^2 + 3 \sum_{i=1}^N \frac{L_i^2}{N^2}.
\end{aligned}$$

Setting  $\sigma_1(\alpha) = \max(\hat{\sigma}_1(\alpha), \tilde{\sigma}_1) > 0$ , we have

$$\|\tilde{\nabla} L^r\|^2 + \sum_{i=1}^N \frac{L_i^2}{N^2} \|x_i^r - z^r\|^2 \leq \sigma_1(\alpha) \left( \|z^r - z^{r+1}\|^2 + \sum_{i=1}^N \|x_i^r - \hat{x}_i^{r+1}\|^2 \right). \tag{5.97}$$

From Lemma 5.3 we know that

$$\mathbb{E}[L^{r+1} - L^r | z^r, x^r] \leq -\frac{\gamma_z}{2} \|z^{r+1} - z^r\|^2 + \sum_{i=1}^N p_i c_i \|x_i^r - \hat{x}_i^{r+1}\|^2 \tag{5.98}$$

Note that  $\gamma_z = \sum_{i=1}^N \eta_i - L_0$ , then define  $\hat{\sigma}_2$  and  $\tilde{\sigma}_2$  as

$$\begin{aligned}
\hat{\sigma}_2(\alpha) &= \max_i \left\{ p_i \left( \frac{\gamma_i}{2} - \frac{L_i^2}{\alpha_i \eta_i N^2} - \frac{1 - \alpha_i}{\alpha_i} \frac{L_i}{N} \right) \right\} \\
\tilde{\sigma}_2 &= \frac{\sum_{i=1}^N \eta_i - L_0}{2}.
\end{aligned}$$

We can set  $\sigma_2(\alpha) = \max(\hat{\sigma}_2(\alpha), \tilde{\sigma}_2)$  to obtain

$$E[L^r - L^{r+1} | x^r, z^r] \geq \sigma_2(\alpha) \left( \sum_{i=1}^N \|\hat{x}_i^{r+1} - x_i^r\|^2 + \|z^{r+1} - z^r\|^2 \right). \tag{5.99}$$

Combining (5.97) and (5.99) we have

$$H(w^r) = \|\tilde{\nabla} L^r\|^2 + \sum_{i=1}^N L_i^2/N \|x_i^r - z^r\|^2 \leq \frac{\sigma_1(\alpha)}{\sigma_2(\alpha)} E[L^r - L^{r+1} | F^r].$$

Let us set  $C(\alpha) = \frac{\sigma_1(\alpha)}{\sigma_2(\alpha)}$  and take expectation on both side of the above equation to obtain:

$$\mathbb{E}[H(w^r)] \leq C(\alpha) E[L^r - L^{r+1}]. \tag{5.100}$$

Summing both sides of the above inequality over  $r = 1, \dots, R$ , we obtain:

$$\sum_{r=1}^R \mathbb{E}[H(w^r)] \leq C(\alpha) E[L^1 - L^{R+1}]. \tag{5.101}$$

Using the definition of  $w^m = (x^m, z^m, \lambda^m)$ , and following the same line of argument as Theorem (2.1) we eventually conclude that

$$\mathbb{E}[H(w^m)] \leq \frac{C(\alpha) \mathbb{E}[L^1 - L^{R+1}]}{R}. \tag{5.102}$$

The proof is complete.

**Q.E.D.**



### 5.7 Proof of Proposition 4.1

Applying the optimality condition on  $z$  subproblem in (5.32) we have:

$$z^{r+1} = \underset{z}{\operatorname{argmin}} h(z) + g_0(z) + \frac{\beta}{2} \|z - u^{r+1}\|^2 \quad (5.103)$$

where the variable  $u^{r+1}$  is given by (cf. (5.29))

$$u^{r+1} = \beta \sum_{i=1}^N (\lambda_i^r + \eta_i x_i^{r+1}). \quad (5.104)$$

Now from one of the key properties of NESTT-G [cf. Section 5.1, equation (5.28)], we have that

$$u^{r+1} = z^r - \beta \left( \frac{1}{N\alpha_{i_r}} (\nabla g_{i_r}(z^r) - \nabla g_{i_r}(y_{i_r}^{r-1})) + \frac{1}{N} \sum_{i=1}^N \nabla g_i(y_i^{r-1}) \right). \quad (5.105)$$

This verifies the claim. **Q.E.D.**

### 5.8 References

- [R1] D. P. Bertsekas and J. N. Tsitsiklis. Neuro-Dynamic Programming. Athena Scientific, Belmont, MA, 1996.
- [R2] M. Hong, Z.-Q. Luo, and M. Razaviyayn. Convergence analysis of alternating direction method of multipliers for a family of nonconvex problems. *SIAM Journal On Optimization*, 26(1):337 - 364, 2016
- [R3] P. Tseng and S. Yun. A coordinate gradient descent method for nonsmooth separable minimization. *Mathematical Programming*, 117:387 - 423, 2009.
- [R4] Z.-Q. Luo and P. Tseng. Error bounds and the convergence analysis of matrix splitting algorithms for the affine variational inequality problem. *SIAM Journal on Optimization*, pages 43 - 54, 1992.
- [R5] Z.-Q. Luo and P. Tseng. On the linear convergence of descent methods for convex essentially smooth minimization. *SIAM Journal on Control and Optimization*, 30(2):408 - 425, 1992.
